# Supplementary material
Source: publisher figshare collection journal article supplement (https://geolsoc.figshare.com/ndownloader/files/16349948)
Supplement: Supplementary file 1 [file 16349948]

## Sheet: Foglio1
Table S3. Chemical composition of selected smithsonites (Sm) and cerussites (Cer) from Ireland (SEM-EDS) analysed for C-O isotope compositions.
	Tynagh								Galmoy						Galmoy								Ross Island Mine				Tynagh	Galmoy
	TY12				TY18				MG2		MG13		MG16		MG17		MG18		MG19		MG22		BM.1964 R6302				TY22	MG8
wt.%	Sm	Sm	Sm	Sm	Sm	Sm	Sm	Sm	Sm	Sm	Sm	Sm	Sm	Sm	Sm	Sm	Sm	Sm	Sm	Sm	Sm	Sm	Sm	Sm	Sm	Sm	Cer	Cer
ZnO	58.98	54.59	50.99	45.29	58.63	61.77	59.63	63.33	59.72	60.5	61.65	61.89	63.52	63.43	60.73	60.68	61.06	61.31	61.05	61.58	62.69	61.99	64.66	57.46	57.04	63.68	0.05	0
CaO	1.3	1.04	0.76	0.61	0.35	1.67	0.6	0.06	0.94	0.84	0.99	0.84	0.63	0.53	1.25	1.27	1.14	1.11	1.1	0.92	0.6	0.85	0	0.5	0.34	0.52	0.17	0
FeO	0.69	4	6.72	13.02	0.08	0.08	0.16	0.04	0.98	0.85	0.29	0.35	0.04	0.09	0.86	0.75	1.16	1.13	1.02	0.65	0.17	0.46	0	4.28	5.75	0	0	0
MnO	1.94	3.26	3.62	3.36	0.25	0.03	0	0.05	0.07	0.1	0	0	0	0	0	0.03	0	0.07	0.05	0	0.03	0.01	0	1.25	1.06	0.48	0	0
CdO	0.17	0.57	0.64	0.82	0.62	0.36	0.91	0.55	0	0	0	0	0	0	0	0	0	0	0	0	0	0	0	0	0	0	0	0.15
CuO	0.04	0.16	0.12	0.03	3.83	0.47	2.82	1.16	0	0	0	0	0	0
PbO	1.19	1.33	1.37	1.44	0.44	0.28	0.5	0.22	1.99	1.91	1.02	1.05	0.67	0.62	1.36	1.39	0.78	0.85	1.15	0.88	0.58	1	0	0	0	0	82.81	84.16
CO2*	34.854	35.3537	35.0866	35.6102	34.6002	35.218	34.7835	35.2209	34.4377	34.6714	34.7321	34.9725	35.1731	35.1323	34.8658	34.7025	35.1911	35.3853	35.0088	35.0179	35.2836	35.1309	34.97	34.87	35.29	35.14	16.54	16.21
Total	99.164	100.304	99.3066	100.18	98.8002	99.878	99.4035	100.631	98.1377	98.8714	98.6821	99.1025	100.033	99.8023	99.0658	98.8225	99.3311	99.8553	99.3788	99.0479	99.3536	99.4409	99.63	98.36	99.48	99.82	99.57	100.52
	formula on the basis of 6 O
Zn	1.83006	1.6699	1.57166	1.37544	1.83254	1.89682	1.85398	1.94456	1.87542	1.88711	1.91962	1.91385	1.95305	1.95255	1.88372	1.89103	1.87645	1.87379	1.88591	1.89843	1.92149	1.90829	2	1.78	1.75	1.96	0.00327941	0
Ca	0.0585442	0.0461734	0.033999	0.0268874	0.0158775	0.0744295	0.0270752	0.00267389	0.0428437	0.0380278	0.0447401	0.0377004	0.028114	0.023679	0.0562734	0.0574429	0.0508469	0.0492371	0.0493184	0.0411644	0.0266914	0.0379772	0	0.02	0.01	0.02	0.0161828	0
Fe	0.0242534	0.138612	0.234641	0.447933	0.00283261	0.00278293	0.00563537	0.00139135	0.0348633	0.0300347	0.0102292	0.0122608	0.00139324	0.00313843	0.0302186	0.0264775	0.0403832	0.0391229	0.0356943	0.0227002	0.00590272	0.0160415	0	0.15	0.2	0	0	0
Mn	0.0690645	0.114416	0.128019	0.117077	0.00896533	0.00105697	0	0.00176147	0.00252214	0.00357877	0	0	0	0	0	0.00107267	0	0.0024546	0.00177214	0.00353709	0.001055	0.000353196	0	0.04	0.04	0.02	0	0
Cd	0.00334332	0.0110515	0.0125032	0.0157842	0.0122827	0.00700681	0.0179329	0.0107039	0	0	0	0	0	0	0	0	0	0	0	0	0	0	0	0	0	0	0	0.01
Cu	0.00126991	0.00500785	0.00378448	0.000932209	0.122486	0.0147672	0.0897102	0.0364438	0	0	0	0	0	0
Pb	0.0134643	0.0148356	0.0153981	0.0159469	0.00501489	0.00313532	0.00566871	0.00246326	0.022788	0.0217245	0.0115813	0.01184	0.00751193	0.00695943	0.0153825	0.0157958	0.00874076	0.00947292	0.0129541	0.00989263	0.00648251	0.0112253	0	0	0	0	1.98054	1.99
C	2	2	2	2	2	2	2	2	2	2	2	2	2	2	2	2	2	2	2	2	2	2	2	2	2	2	2	2
* Calcutated from stoichiometry
